# Supplementary material
Source: HighWire-hosted journal article supplement (http://www.qdcxjkg.com/highwire/filestream/113937/field_highwire_adjunct_files/0/erj01347-2012_supplementary_tables.pdf)
Supplement: erj01347-2012_supplementary_tables.pdf [file erj01347-2012_supplementary_tables.pdf]

**Table S1: Drugs used in treatment by MDR-TB patient group**

|                                                                     | MDR-TB,<br>susceptible<br>to FQ & INJ<br>("MDR-TB<br>only")<br>(N=4763)<br>N (%) | MDR-<br>TB+INJr<br>(N=1130)<br>N (%) | MDR-TB<br>+FQr<br>(N=426)<br>N (%) | XDR-TB<br>(N=405)<br>N (%)* | TOTALS<br>(N=6724)<br>N (%) |
|---------------------------------------------------------------------|----------------------------------------------------------------------------------|--------------------------------------|------------------------------------|-----------------------------|-----------------------------|
| <b>Group 1</b>                                                      |                                                                                  |                                      |                                    |                             |                             |
| Ethambutol                                                          | 2401 (50)                                                                        | 315 (28)                             | 117 (27)                           | 123 (30)                    | 2956 (44 )                  |
| Pyrazinamide                                                        | 3436 (72)                                                                        | 609 (54)                             | 226 (53)                           | 225 (56)                    | 4496(67)                    |
| Rifabutin                                                           | 35 (1)                                                                           | 16 (1)                               | 11 (3)                             | 10 (2)                      | 72 (1)                      |
| <b>Group 2</b>                                                      |                                                                                  |                                      |                                    |                             |                             |
| Any fluoroquinolone                                                 | 4346 (91)                                                                        | 1043 (92)                            | 309(73)                            | 309 (76)                    | 6007 (89)                   |
| Ciprofloxacin                                                       | 228 (5)                                                                          | 68 (6)                               | 15 (4)                             | 6 (1)                       | 317 (5)                     |
| Ofloxacin or levofloxacin <750mg                                    | 4237 (89)                                                                        | 1009 (89)                            | 271 (64)                           | 286 (71)                    | 5803 (86)                   |
| Gatifloxacin, levofloxacin ≥750 mg,<br>moxifloxacin or sparfloxacin | 90 (4)                                                                           | 26 (3)                               | 32 (7)                             | 21 (5)                      | 169 (5)                     |
| <b>Group 3</b>                                                      |                                                                                  |                                      |                                    |                             |                             |
| Any injectable drug                                                 | 4119 (86)                                                                        | 942 (83)                             | 324 (76)                           | 334 (82)                    | 5719 (85)                   |
| Any second-line injectable drug<br>(i.e. excluding streptomycin)    | 3603 (76)                                                                        | 834 (74)                             | 253 (59)                           | 282 (69)                    | 4972 (74)                   |
| Streptomycin                                                        | 616 (13)                                                                         | 135 (12)                             | 94 (22)                            | 68 (17)                     | 913 (14)                    |
| Amikacin or kanamycin                                               | 3306 (69)                                                                        | 251 (22)                             | 214 (50)                           | 132 (33)                    | 3903 (59)                   |
| Capreomycin                                                         | 481 (10)                                                                         | 633 (56)                             | 63 (15)                            | 164 (40)                    | 1341 (20)                   |
| Enviomycin                                                          | 20 (0.5)                                                                         | 8 (1)                                | 3 (1)                              | 4 (1)                       | 35 (0.5)                    |
| <b>Group 4</b>                                                      |                                                                                  |                                      |                                    |                             |                             |
| Any Group 4 drug used                                               | 4531 (95)                                                                        | 1090 (96)                            | 398 (93)                           | 384 (95)                    | 6403 (95)                   |
| Ethionamide                                                         | 2279 (48)                                                                        | 253 (22)                             | 79 (19)                            | 97 (24)                     | 2708 (40)                   |
| Prothionamide                                                       | 1959 (41)                                                                        | 629 (56)                             | 274 (64)                           | 224 (55)                    | 3086 (46)                   |
| Ethionamide or prothionamide                                        | 4158 (87)                                                                        | 864 (76)                             | 344 (81)                           | 318 (79)                    | 5684 (85)                   |
| Cycloserine or terizidone                                           | 2760 (58)                                                                        | 1002 (89)                            | 379 (89)                           | 341 (84)                    | 4482 (67)                   |
| p-aminosalicylic acid (PAS)                                         | 1682 (35)                                                                        | 520 (46)                             | 271 (64)                           | 242 (60)                    | 2715 (40)                   |
| 0 Group 4 drugs used                                                | 232 (5)                                                                          | 40 (4)                               | 28 (7)                             | 21 (5)                      | 321 (5)                     |
| 2 Group 4 drugs used                                                | 1406 (30)                                                                        | 510 (45)                             | 134 (31)                           | 126 (31)                    | 2176 (32)                   |
| 3 Group 4 drugs used                                                | 1334 (28)                                                                        | 393 (35)                             | 231 (54)                           | 196 (48)                    | 2154 (32)                   |
| <b>Group 5</b>                                                      |                                                                                  |                                      |                                    |                             |                             |
| Any Group 5 drug used                                               | 828 (18)                                                                         | 500 (44)                             | 155 (36)                           | 172 (43)                    | 1655 (25)                   |
| Amoxicillin/clavulanate                                             | 242 (5)                                                                          | 127 (11)                             | 83 (19)                            | 102 (25)                    | 554 (8)                     |
| Clofazimine                                                         | 246 (5)                                                                          | 78 (7)                               | 28 (7)                             | 23 (6)                      | 375 (6)                     |
| Imipenem                                                            | 6 (0.2)                                                                          | 0 (-)                                | 0 (-)                              | 1 (-)                       | 7 (0.1)                     |
| Linezolid                                                           | 15 (0.4)                                                                         | 6 (1)                                | 8 (3)                              | 9 (3)                       | 38 (1)                      |
| Macrolides                                                          | 147 (3)                                                                          | 51 (5)                               | 88 (21)                            | 58 (14)                     | 344 (5)                     |
| Thiacetazone                                                        | 311 (7)                                                                          | 315 (28)                             | 13 (3)                             | 38 (9)                      | 677 (11)                    |
| 0 Group 5 drugs used                                                | 3935 (83)                                                                        | 630 (56)                             | 271 (64)                           | 233 (57)                    | 5069 (76)                   |
| 1 Group 5 drug used                                                 | 679 (14)                                                                         | 423 (37)                             | 96 (23)                            | 116 (29)                    | 1314 (18)                   |
| 2 Group 5 drugs used                                                | 126 (3)                                                                          | 63 (6)                               | 48 (11)                            | 51 (13)                     | 288 (5)                     |
| 3+ Group 5 drugs used                                               | 23 (0.5)                                                                         | 14 (1)                               | 11 (3)                             | 5 (1)                       | 53 (1)                      |
| <b>Adjunctive Pulmonary Resection<br/>Surgery performed</b>         | 189 (4)                                                                          | 72 (6)                               | 64 (15)                            | 48 (11)                     | 373 (6)                     |

\* Percentages – rounded to nearest whole number unless 0.5 or less. May not add to 100% due to rounding.

MDR-TB = resistance to at least isoniazid **and** rifampicin

XDR-TB = MDR-TB plus resistance to any fluoroquinolone **and** any second-line injectable drug (amikacin/kanamycin and/or capreomycin)

MDR-TB+FQr = MDR-TB plus resistance to any fluoroquinolone, but susceptible to amikacin/kanamycin and/or capreomycin (at least one second-line injectable drug tested)

MDR-TB+INJr = MDR-TB plus resistance to amikacin/kanamycin and/or capreomycin, but susceptible to fluoroquinolones

MDR-TB, susceptible to FQ & INJ = MDR-TB, but susceptible to fluoroquinolones, amikacin/kanamycin and capreomycin (at least one second-line injectable drug tested)

Later-generation fluoroquinolone = gatifloxacin, levofloxacin, moxifloxacin, sparfloxacin

Macrolides = azithromycin, clarithromycin, roxithromycin

**Table S2: Patient series included in the analysis by MDR-TB patient group**

| Authors of patient series (Reference) | Setting               | MDR-TB+INJr | MDR-TB+FQr | XDR-TB     | Total Analysed* |
|---------------------------------------|-----------------------|-------------|------------|------------|-----------------|
| Avendaño M., Goldstein R. (24)        | Canada                | 3           | 8          | 0          | 64              |
| Burgos M. et al (25)                  | USA                   | 1           | 0          | 0          | 45              |
| Chan E.D. et al (26)                  | USA                   | 22          | 11         | 9          | 102             |
| Chiang C.Y. et al (27)                | Taiwan, China         | 13          | 0          | 0          | 125             |
| Cox H. et al (28)                     | Uzbekistan            | 21          | 0          | 0          | 77              |
| DeRiemer K. et al (29)                | Mexico                | -           | -          | -          | 0               |
| Escudero E. et al (30)                | Spain                 | 0           | 4          | 3          | 16              |
| Geerligs W.A. et al (31)              | Netherlands           | 3           | 0          | 0          | 43              |
| Granich R.M. et al (32)               | USA                   | 3           | 3          | 1          | 18              |
| Holtz T.H. et al (33)                 | S. Africa             | 19          | 0          | 30         | 1786            |
| Kim D.H. et al (34)                   | Rep. of Korea         | 107         | 152        | 66         | 1354            |
| Kim H-R. et al (35)                   | Rep. of Korea         | 24          | 39         | 28         | 210             |
| Kwon Y.S. et al (36)                  | Rep. of Korea         | 14          | 40         | 26         | 155             |
| Lemaine V. et al (37)                 | Latvia                | 444         | 18         | 47         | 992             |
| Lockman S. et al (38)                 | Estonia               | 134         | 13         | 65         | 283             |
| Masjedi M.R. et al (39)               | Iran (Islamic Rep.)   | 0           | 4          | 16         | 22              |
| Migliori G.B. et al (40)              | Italy                 | 16          | 9          | 12         | 86              |
| Mitnick C.M. et al (41)               | Peru                  | 48          | 9          | 6          | 220             |
| Munsiff S.S. et al (42)               | USA                   | 40          | 2          | 0          | 107             |
| Narita M. et al (43)                  | USA                   | 3           | 1          | 1          | 67              |
| O’Riordan P. et al (44)               | UK                    | 0           | 0          | 0          | 28              |
| Palmero D.J. et al (45)               | Argentina             | -           | -          | -          | 0               |
| Park S.K. et al (46)                  | Rep. of Korea         | 20          | 26         | 11         | 142             |
| Pérez-Guzmán C. et al (47)            | Mexico                | -           | -          | -          | 0               |
| Quy H.T. et al (48)                   | Viet Nam              | -           | -          | -          | 0               |
| Schaaf H.S. et al (49)                | S. Africa             | 2           | 0          | 0          | 2               |
| Shin S.S. et al (50)                  | Russian Fed.          | 188         | 48         | 73         | 569             |
| Shiraishi Y. et al (51)               | Japan                 | 0           | 0          | 0          | 1               |
| Tupasi T.E. et al (52)                | Philippines           | 2           | 37         | 10         | 169             |
| Uffredi M-L. et al (53)               | France                | 3           | 2          | 1          | 41              |
| Yew W.W. et al (54),(55)              | China (Hong Kong SAR) | -           | -          | -          | 0               |
| <b>TOTAL</b>                          |                       | <b>1130</b> | <b>426</b> | <b>405</b> | <b>6724</b>     |

\* Total analysed = patients whose MDR-TB strains were tested for susceptibility to at least one fluoroquinolone and at least one second-line injectable drug (amikacin/kanamycin and/or capreomycin).

MDR-TB: resistance to at least isoniazid **and** rifampicin

XDR-TB: At least MDR-TB plus resistance to any fluoroquinolone **and** any second-line injectable drug (amikacin/kanamycin and/or capreomycin)

MDR-TB+FQr = MDR-TB plus resistance to any fluoroquinolone, but susceptible to amikacin/kanamycin and/or capreomycin (and at least one second-line injectable drug tested)

MDR-TB+INJr = MDR-TB plus resistance to amikacin/kanamycin and/or capreomycin, but susceptible to fluoroquinolones

MDR-TB, susceptible to FQ & INJ = MDR-TB but susceptible to fluoroquinolones, and to amikacin/kanamycin and/or capreomycin (at least one second-line injectable drug tested)

**Table S3 - Odds of treatment success vs fail/relapse/death by specific regimens and MDR-TB patient group**

| Regimen*  | MDR-TB susceptible to FQ & INJ ("MDR-TB only") |            |                    | MDR-TB+INJr |            |                    | MDR-TB+FQr |            |                   | XDR-TB |     |             | Total |
|-----------|------------------------------------------------|------------|--------------------|-------------|------------|--------------------|------------|------------|-------------------|--------|-----|-------------|-------|
|           | N                                              | aOR        | (95%CI)            | N           | aOR        | (95%CI)            | N          | aOR        | (95%CI)           | N      | aOR | (95%CI)     |       |
| Regimen 1 | 1803                                           | 1.0        | (reference)        | 154         | 1.0        | (reference)        | 97         | 1.0        | (reference)       | 60     | 1.0 | (reference) | 3466  |
| Regimen 2 | 148                                            | <b>0.6</b> | <b>(0.4, 0.96)</b> | 82          | 0.5        | (0.2, 1.2)         | 12         | <b>0.2</b> | <b>(0.1, 0.7)</b> | 20     | 1.1 | (0.3, 4.6)  | 316   |
| Regimen 3 | 165                                            | 1.1        | (0.7, 1.8)         | 381         | <b>0.5</b> | <b>(0.3, 0.9)</b>  | 23         | 0.5        | (0.2, 1.4)        | 81     | 0.6 | (0.2, 1.5)  | 871   |
| Regimen 4 | 500                                            | 0.8        | (0.5, 1.2)         | 144         | 0.7        | (0.3, 1.3)         | 67         | 1.7        | (0.4, 6.6)        | 42     | 0.4 | (0.1,1.3)   | 1363  |
| Regimen 5 | 119                                            | <b>0.5</b> | <b>(0.3, 0.8)</b>  | 23          | 0.6        | (0.2, 1.5)         | 41         | 0.7        | (0.3, 1.5)        | 39     | 1.0 | (0.4, 2.9)  | 343   |
| Regimen 6 | 68                                             | <b>0.4</b> | <b>(0.2, 0.7)</b>  | 12          | <b>0.1</b> | <b>(0.03, 0.4)</b> | 13         | 1.4        | (0.5, 4.4)        | 9      | 0.4 | (0.1, 1.6)  | 254   |
| Regimen 7 | 15                                             | <b>0.1</b> | <b>(0.04, 0.2)</b> | 3           | 0.2        | (0.1, 1.1)         | 3          | 0.7        | (0.1, 5.1)        | 8      | 3.8 | (0.6, 23.2) | 121   |

\* Regimens:

Regimen 1- ofloxacin or later-generation fluoroquinolone + kanamycin; no capreomycin

Regimen 2- ofloxacin or later-generation fluoroquinolone + kanamycin + capreomycin

Regimen 3- ofloxacin or later-generation fluoroquinolone + capreomycin; no kanamycin

Regimen 4- ofloxacin or later-generation fluoroquinolone, no capreomycin, no kanamycin

Regimen 5- No ofloxacin or later-generation fluoroquinolone, any second-line injectable drug

Regimen 6- No ofloxacin or later-generation fluoroquinolone, no second-line injectable drug, at least one Group 4 or Group 5 drug

Regimen 7- None of the above – first-line drugs only

aOR (adjusted odds ratios): odds ratios of treatment success (cure and completion) versus treatment failure or relapse adjusted for age, sex, HIV infection, past TB treatment, past MDR treatment (treatment for more than 1 month with two or more second line drugs), and extent of disease. If there were <15 observations no estimate was derived.

CI = confidence interval. Success = cure or treatment completion (see also Methods)

Total = all patients in data set who received this regimen regardless of treatment outcome

N = number of patients who received the regimen in the particular MDR-TB patient group and had an outcome success, treatment failure or relapse.

Later-generation fluoroquinolones = gatifloxacin, levofloxacin, moxifloxacin, sparfloxacin

Group 4 drugs =ethionamide, prothionamide, cycloserine, terizidone, and *p*-aminosalicylic acid (PAS)

Group 5 drugs = amoxicillin/clavulanate, macrolides (azithromycin, clarithromycin, roxithromycin), clofazimine, thiacetazone, imipenem, linezolid, high-dose isoniazid, and thioridazine.
